# Supplementary material
Source: PubMed Central journal article supplement (PMC6741527)
Supplement: jin-0006-0846-s01.pdf [file jin-0006-0846-s01.pdf]

## Supplemental Figure

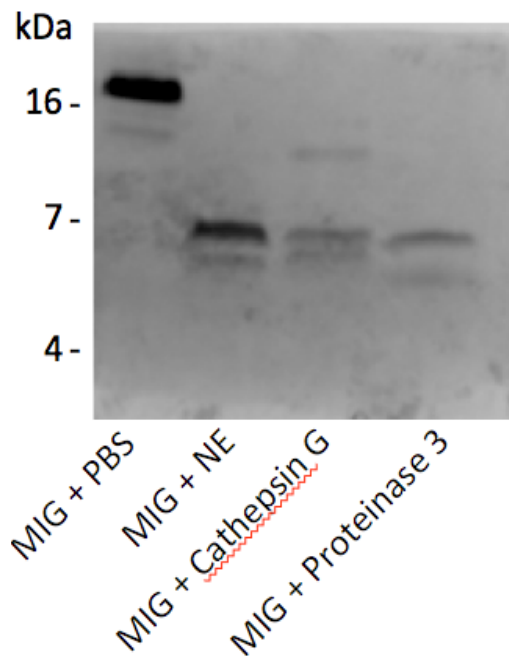

**Figure 1. Degradation of MIG/CXCL9 by the neutrophil serine-proteases elastase, cathepsin G, and proteinase 3.**

The serine-proteases of neutrophils (elastase (NE), cathepsin G, and proteinase 3; 0.5  $\mu$ g) were incubated with MIG/CXCL9 (5  $\mu$ g) for 18 hours followed by separation on SDS-PAGE and visualization by Coomassie-staining. In all cases, a major MIG/CXCL9-fragment of a similar size (around 6 kD) appeared.

## **Supplemental Material and Methods**

### **Proteolysis and SDS-PAGE**

Five micrograms of MIG/CXCL9 was incubated with the serine-proteases of neutrophils (elastase (NE), cathepsin G, and proteinase 3; 0.5 µg) or in PBS alone for 18 h at 37°C. After separation by SDS-PAGE, the peptides were visualized by Coomassie staining.
